# Supplementary material for: Increased dietary 5-hydroxytryptophan reduces fearfulness in red junglefowl hens (Gallus gallus)
Source: Front Physiol. 2023 Sep 12;14:1213986. doi: 10.3389/fphys.2023.1213986 (PMC10520959; doi:10.3389/fphys.2023.1213986)
Supplement: Supplementary file 1 [file DataSheet1.xlsx]

## Sheet: Explanation of headings
Data file for study 'Increased dietry 5-hydroxytryptophan reduces fearfulness in red junglefowl hens (Gallus gallus)', By Lundgren & Løvlie.
Corresponding author: Hanne Løvlie, hanne.lovlie@liu.se
File: Lundgren & Lovlie
Column headings	Explanation of headings
ID	ID number tag of the individual hen.
Treatment	The treatment a hen recived: control, or 5-HTP manipulation.
TI 1 (s)	Latency in seconds for a hen to stand upright after being placed in tonic immobility. First trial carried out, i.e. prior to treatment for hens in the Treatment group.
TI 1 attempts	Number of attempts to place a hen in tonic immobility during first tonic immobility test carried out.
TI 2 (s)	Latency in seconds for a hen to stand upright after being placed in tonic immobility. Test carried out 5 days after the first trial, i.e. after 5 days of treatment for hens in the Treatment group.
TI 2 attempts	Number of attempts to place a hen in tonic immobility during second tonic immobility test carried out.
∆TI	Change in latency (in seconds) for a hen to stand upright after being placed in tonic immobility, between first and second trial. Data was made positive before analyses (see main text).
	For TI latencies: a hen that took 600 seconds or longer was given 600 seconds as a max latency.
	For TI attempts: if 3 attempts failed in inducing tonic immobility, the hen was given 0 s as latency.

## Sheet: Data
ID	Treatment	TI 1 (s)	TI 1 attempts	TI 2 (s)	TI 2 attempts	∆TI
1106	control	20	2	0	3	20
1108	control	592	2	55	3	537
1112	control	28	1	65	1	-37
1113	control	518	3	0	3	518
1114	control	15	2	193	3	-178
1135	control	20	1	0	3	20
1136	control	38	2	25	2	13
1138	control	140	1	251	2	-111
1141	control	396	2	0	3	396
1144	control	600	1	600	3	0
5707	control	64	1	81	1	-17
5713	control	600	2	600	3	0
5717	control	548	1	52	1	496
5719	control	394	1	5	1	389
5720	control	563	1	582	2	-19
5728	control	216	1	162	1	54
5746	control	556	1	179	2	377
5773	control	68	1	240	2	-172
5776	control	20	2	511	1	-491
5779	control	11	2	138	3	-127
5782	control	84	1	178	1	-94
5784	control	582	2	352	1	230
5796	control	27	1	0	3	27
#5	control	570	1	300	1	270
1107	5-HTP	6	1	0	3	6
1124	5-HTP	600	1	160	1	440
1129	5-HTP	50	1	37	1	13
1130	5-HTP	177	2	0	3	177
1133	5-HTP	8	1	55	1	-47
1134	5-HTP	9	1	7	2	2
1140	5-HTP	0	3	0	3	0
5701	5-HTP	280	3	0	3	280
5704	5-HTP	54	1	91	1	-37
5705	5-HTP	128	1	0	3	128
5711	5-HTP	570	1	19	1	551
5726	5-HTP	112	1	74	1	38
5738	5-HTP	476	2	456	1	20
5739	5-HTP	8	1	27	1	-19
5748	5-HTP	600	3	600	1	0
5749	5-HTP	296	1	7	2	289
5763	5-HTP	354	1	136	2	218
5772	5-HTP	42	1	138	2	-96
5781	5-HTP	371	2	28	1	343
5785	5-HTP	529	1	384	3	145
5786	5-HTP	584	2	104	1	480
5790	5-HTP	178	2	406	1	-228
5795	5-HTP	7	1	75	1	-68
#1	5-HTP	506	1	15	1	491
